# Supplementary material for: Sonic hedgehog controls growth of external genitalia by regulating cell cycle kinetics
Source: PubMed Central journal article supplement — Nat Commun. 2010 Jun 1;1(3):1–9. doi: 10.1038/ncomms1020 (PMC2964453; doi:10.1038/ncomms1020), 2010-06-01
Supplement: ncomms1020-s1.pdf [file ncomms1020-s1.pdf]

# SUPPLEMENTARY INFORMATION

Seifert et al. *Sonic hedgehog controls growth of external genitalia by regulating cell cycle kinetics.*

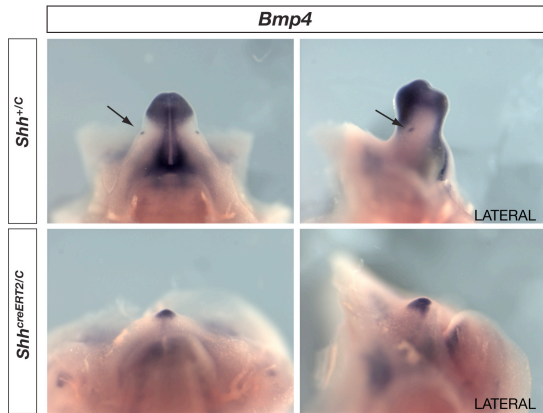

**Figure S1** *ShhcreERT2* embryos show regionalized reduction of *Bmp4* expression. *Bmp4* expression in E13.5 *Shh<sup>creERT2/C</sup>* embryos and wildtype littermate 48 hours after *Shh* pathway inactivation. In mutant embryos, *Bmp4* expression remains at the distal tip of the genital tubercle, but is down-regulated in the mesenchyme adjacent to the urethral plate and is undetectable in the region where the preputial glands normally develop (black arrows).

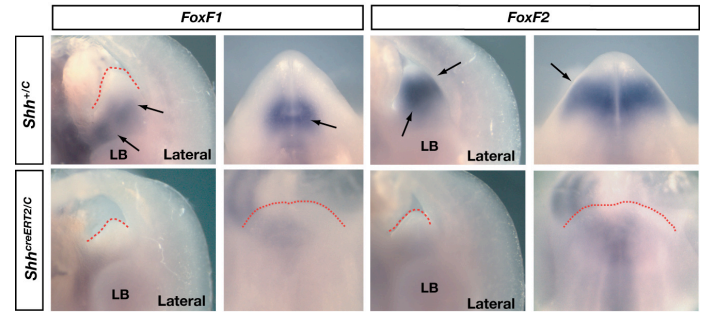

**Figure S3.** Loss of *Shh* signaling results in down-regulation of *Foxf1* and *Foxf2*. *In situ* hybridization of *Foxf1* and *Foxf2* in control *Shh<sup>+/C</sup>* and *Shh<sup>creERT2/C</sup>* embryos. Twenty-four hours after loss of *Shh* signaling at E11.5 (tamoxifen injection at E10.5), both *Foxf1* and *Foxf2* are down-regulated in genital mesenchyme (black arrows). Arrows mark normal regions of expression in control embryos. Red outlines show tubercle in *Shh<sup>creERT2/C</sup>* embryos. LB, Limb bud.

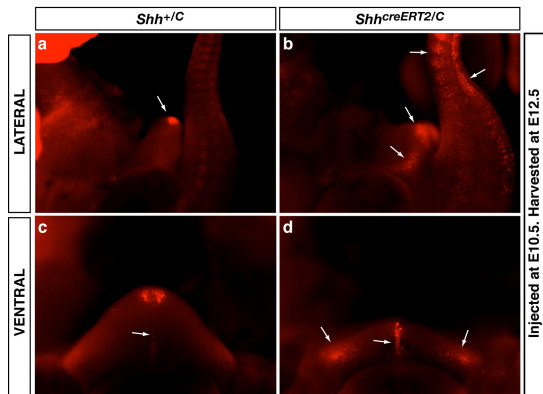

**Figure S2** Loss of *Shh* signaling does not result in widespread cell death in the genital tubercle. Comparison of cell death in the genital tubercle. Comparison of cell death in control *Shh<sup>+/C</sup>* (a, c) and *Shh<sup>creERT2/C</sup>* (b, d) genitalia 48 hours after injection of tamoxifen at E10.5. Red staining shows cells that are positive for Lysotracker Red, which labels dying cells. (a, b) Lateral views of the genital tubercles with the tail to the right. Arrows show regions of abundant cell death. (c, d) Ventral views of genital tubercles. Lysotracker red showed similar low levels of mesodermal and endodermal cell death in *Shh<sup>creERT2/C</sup>* and wild type genital tubercles, except for two small domains of dying cells that were seen at the proximal-lateral edges of mutant tubercle (vertical arrows in d). Horizontal arrows in (c, d) show cell death in urethral plate.
